# Supplementary material for: Improved activity and stability of ZnIn2S4 for H2 production under visible light through cerium UiO-66
Source: Royal Society of Chemistry journal article supplement (doi:10.1039/d3se00024a), 2023-01-01
Supplement: d3se00024a1.pdf [file d3se00024a1.pdf]

## Supporting Information

# Improved activity and stability of $\text{ZnIn}_2\text{S}_4$ for $\text{H}_2$ production under visible light through Cerium UiO-66

Wenqing Hou, Chen Chen, Min Chen, and Yiming Xu\*

State Key Laboratory of Silicon Materials and Department of Chemistry, Zhejiang University,  
Hangzhou 310027, China.

\* To whom correspondence should be addressed. Fax: +86 57187951895, Email: [xuym@zju.edu.cn](mailto:xuym@zju.edu.cn)

| Contents                                                                | Pages |
|-------------------------------------------------------------------------|-------|
| Experimental procedures for sample synthesis                            | 2/9   |
| Table S1. Amounts of reagents used for synthesis                        |       |
| Table S2. XPS peak assignment                                           | 3/9   |
| Table S3. Literature survey for $\text{H}_2$ production                 | 4/9   |
| Fig. S1 XRD, SEM and elemental mapping                                  | 5/9   |
| Fig. S2 and S3 $\text{N}_2$ adsorption, absorption and emission spectra | 6/9   |
| Fig. S4 XPS spectra                                                     | 7/9   |
| Fig. S5 XRD and XPS spectra before and after photoreaction              |       |
| Fig. S6 Nyquist and Mott–Schottky plots                                 | 8/9   |
| Reference                                                               | 9/9   |

## **Experimental procedure for the synthesis of Zr-based UiO-66 (Zr-U66)**

Zirconium UiO-66 (denoted as Zr-U66) was synthesized by following the previous report.<sup>1</sup> ZrCl<sub>4</sub> (233 mg), and terephthalic acid (166 mg) were dispersed in DMF (50 mL), followed by addition of 150 μL CH<sub>3</sub>COOH. After heating at 120 °C for 24 h, the solid was collected, washed with DMF and ethanol several times, and dried in a vacuum oven at 60 °C overnight. Then Zr-U66/ZIS was prepared with the same procedure used for Ce-U66/ZIS (see details in the text).

**Table S1.** Recipe for the synthesis of 20–50% Ce-U66/ZIS samples

| Reagents                                  | 20%   | 30%   | 40%   | 50%  | ZIS  |
|-------------------------------------------|-------|-------|-------|------|------|
| Ce-U66 (mg)                               | 20.0  | 30.0  | 40.0  | 50.0 | 0    |
| ZnCl <sub>2</sub> (mg)                    | 43.9  | 38.4  | 32.9  | 27.4 | 54.8 |
| InCl <sub>3</sub> ·4H <sub>2</sub> O (mg) | 163.2 | 142.8 | 122.4 | 102  | 204  |
| TAA (mg)                                  | 85.7  | 75.0  | 64.3  | 53.5 | 107  |

**Table S2.** XPS analysis for Ce<sup>3+</sup> and Ce<sup>4+</sup> species in different samples<sup>a</sup>

| Species          | Ce-U66  |        |       | 30 Ce-U66/ZIS |        |       | 30% Ce-U66/ZIS <sup>b</sup> |        |       |
|------------------|---------|--------|-------|---------------|--------|-------|-----------------------------|--------|-------|
|                  | BE (eV) | A      | Y (%) | BE (eV)       | A      | Y (%) | BE (eV)                     | A      | Y (%) |
| Ce <sup>3+</sup> | 881.2   | 14307  |       | 881.2         | 6427   |       | 881.2                       | 16917  |       |
|                  | 885.7   | 160971 | 44.0  | 885.6         | 136080 | 44.3  | 885.6                       | 120649 | 49.0  |
|                  | 899.2   | 28785  |       | 899.1         | 18083  |       | 899.1                       | 17050  |       |
|                  | 904.4   | 122772 |       | 904.2         | 85960  |       | 904.2                       | 91493  |       |
| Ce <sup>4+</sup> | 882.9   | 88519  |       | 882.9         | 72630  |       | 882.9                       | 65314  |       |
|                  | 887.5   | 63659  |       | 887.4         | 50128  |       | 887.4                       | 42962  |       |
|                  | 898.4   | 2272   | 56.0  | 898.3         | 600    | 55.7  | 898.3                       | 3424   | 51.0  |
|                  | 901.5   | 78414  |       | 901.3         | 49018  |       | 901.2                       | 47154  |       |
|                  | 907.2   | 101342 |       | 907.1         | 82254  |       | 907.0                       | 60017  |       |
|                  | 917.1   | 81330  |       | 917.0         | 56194  |       | 917.0                       | 37728  |       |

<sup>a</sup>BE, binding energy; A, peak area; Y, the relative content. <sup>b</sup>after photoreaction for 8 h.

**Table S3.** Literature survey for H<sub>2</sub> production on different photocatalysts<sup>a</sup>

| Samples                             | H <sub>2</sub> (μmol/h) | Cat. (mg/mL) | Sacrifices                                        | Light source   | Ref. |
|-------------------------------------|-------------------------|--------------|---------------------------------------------------|----------------|------|
| ZIS/Ce-U66                          | 273.5                   | 0.50         | Na <sub>2</sub> S/Na <sub>2</sub> SO <sub>3</sub> | LED/λ = 420 nm | This |
| Au/UiOS/ZIS                         | 391.6                   | 0.40         | Na <sub>2</sub> S/Na <sub>2</sub> SO <sub>3</sub> | Xe/420–780 nm  | [2]  |
| ZIS/UiO-66                          | 122.5                   | 0.47         | 15% TEOA                                          | Xe/λ > 400 nm  | [3]  |
| ZIS/MIL-125-NH <sub>2</sub>         | 110.2                   | 0.50         | Na <sub>2</sub> S/Na <sub>2</sub> SO <sub>3</sub> | Xe/λ > 420 nm  | [4]  |
| CdS/Ce-UiO-66-NH <sub>2</sub>       | 103                     | 0.50         | Na <sub>2</sub> S/Na <sub>2</sub> SO <sub>3</sub> | LED/λ = 420 nm | [5]  |
| CdS/UiOS                            | 153.2                   | 0.50         | Na <sub>2</sub> S/Na <sub>2</sub> SO <sub>3</sub> | Xe/λ > 420 nm  | [6]  |
| Pt/ZnCdS/Ti-MIL-125-NH <sub>2</sub> | 391                     | 0.20         | 20% TEOA                                          | Xe/λ > 420 nm  | [7]  |
| ZIS/CdS/Ti-MIL-125-NH <sub>2</sub>  | 923                     | 1.0          | 20% MeOH                                          | Xe/λ > 400 nm  | [8]  |
| PdS/ZnCdS/Zr-UiO66-SH               | 461                     | 0.50         | Na <sub>2</sub> S/Na <sub>2</sub> SO <sub>3</sub> | Xe/λ > 420 nm  | [9]  |

<sup>a</sup>SH, 2,5-disulfanyl; TEOA, triethanolamine; MeOH, methanol; LED, 4 W light emitting diode.

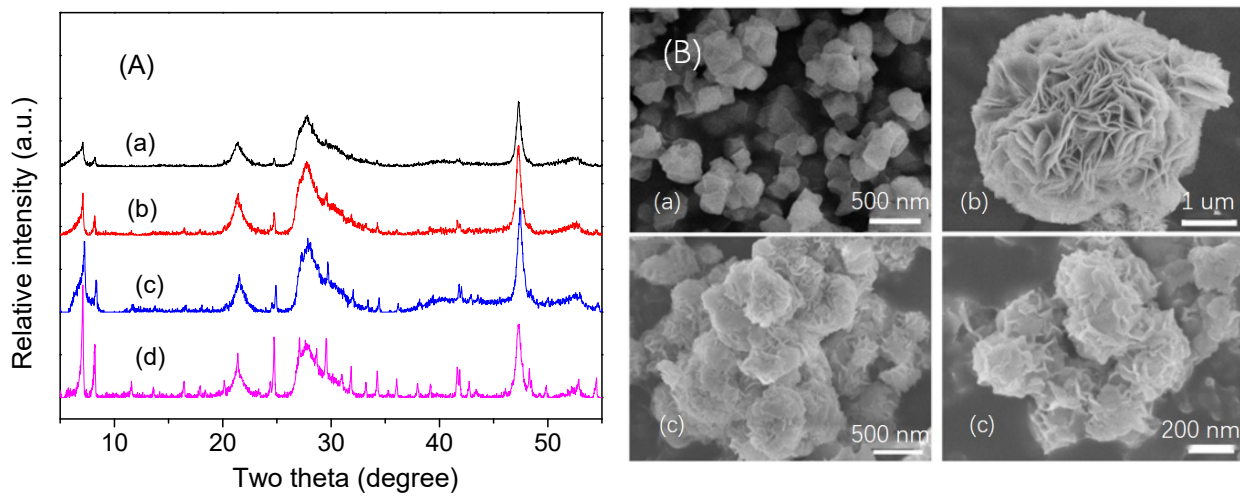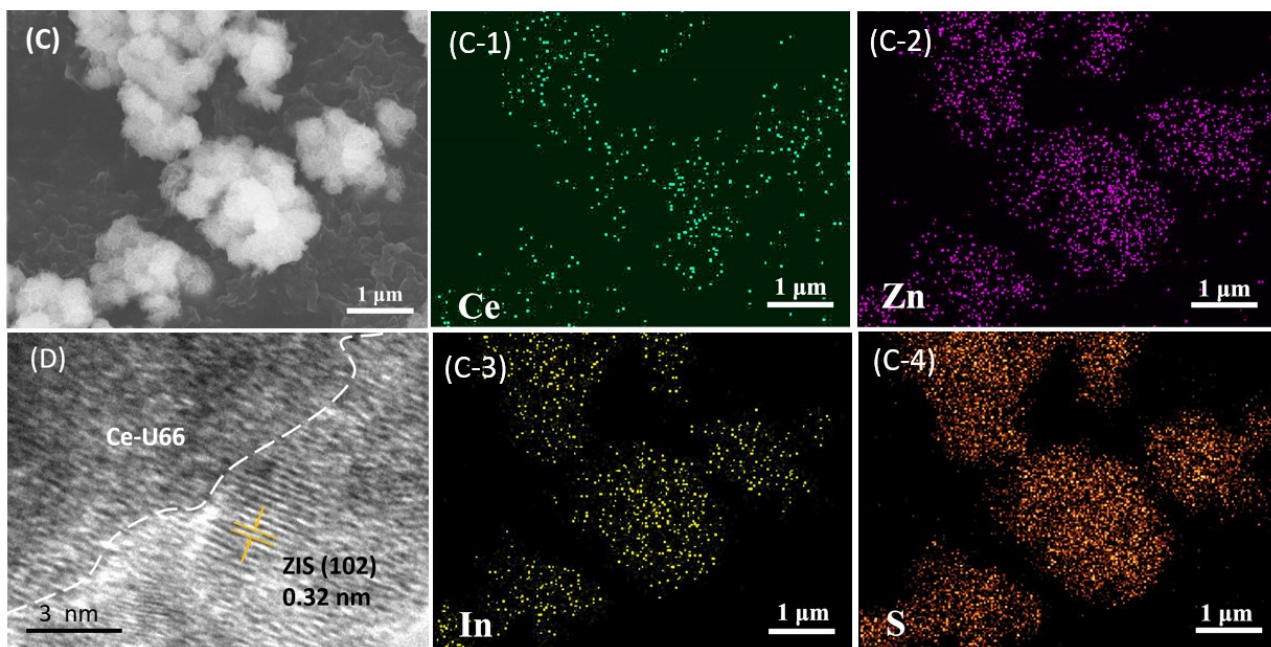

**Fig. S1** (A) XRD patterns for  $x$  Ce-U66/ZIS, where  $x$  (wt%) was (a) 20, (b) 30, (c) 40, and (d) 50. (B, C) SEM images and for Elemental mapping (a) Ce-U66, (b) ZIS, and (c) 30% Ce-U66/ZIS, and (D) HRTEM image for 30% Ce-U66/ZIS.

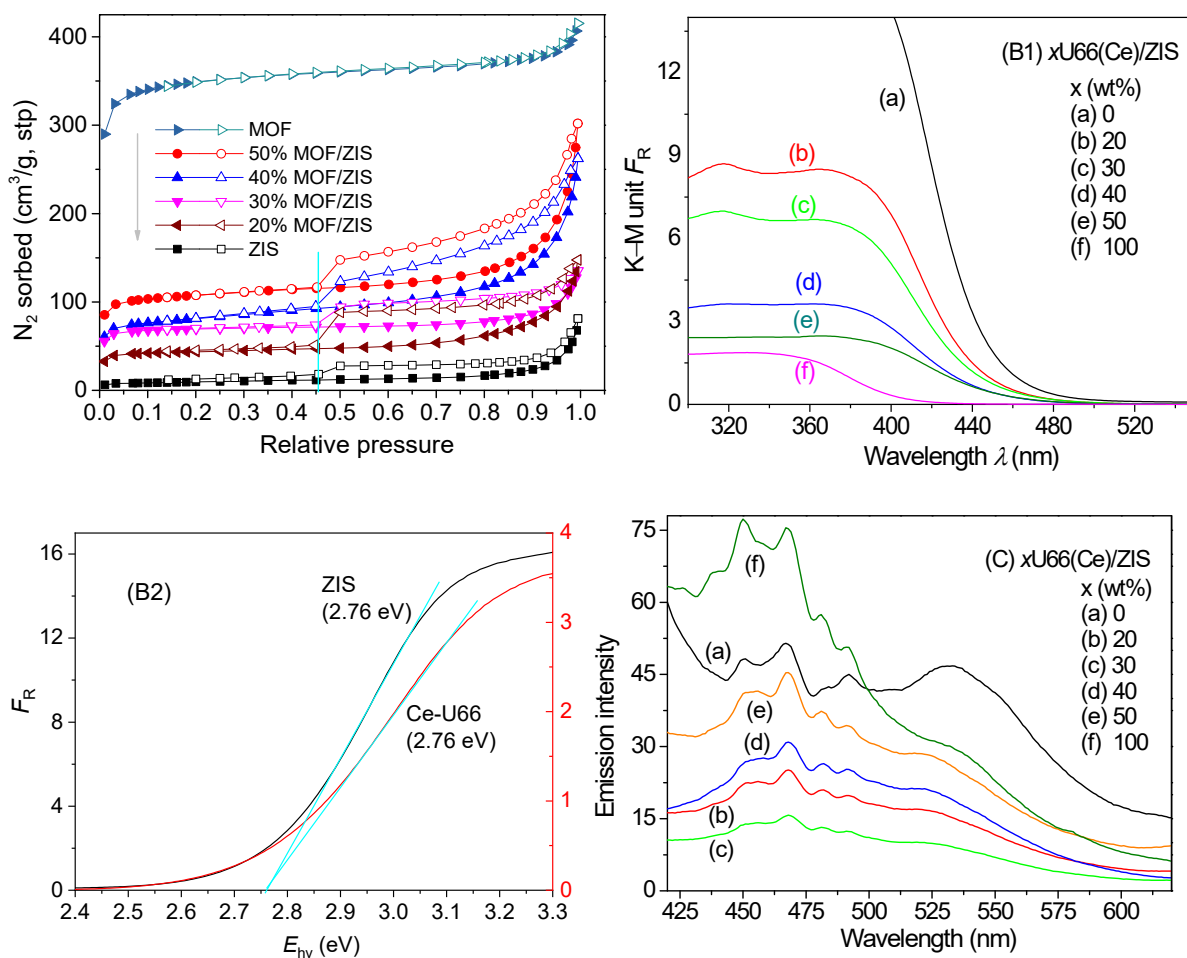

**Fig. S2** (A) Isotherms of N<sub>2</sub> adsorption (solid symbols) and desorption (open symbols) on solids as indicated by the legends. (B1) Absorption and (C) photoluminescence spectra for xCe-U66/ZIS, and (B2) the calculation of band energy for ZIS and Ce-U66.

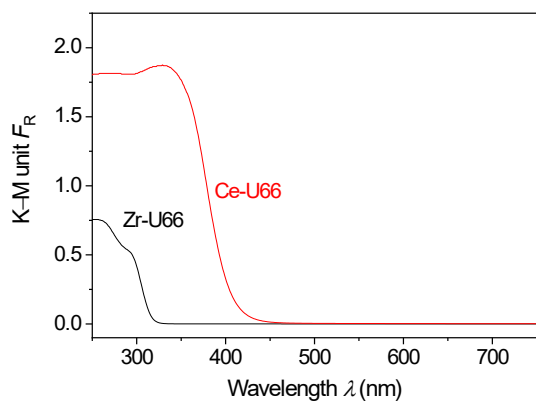

**Fig. S3** Absorption spectra for Zr-U66 and Ce-U66.

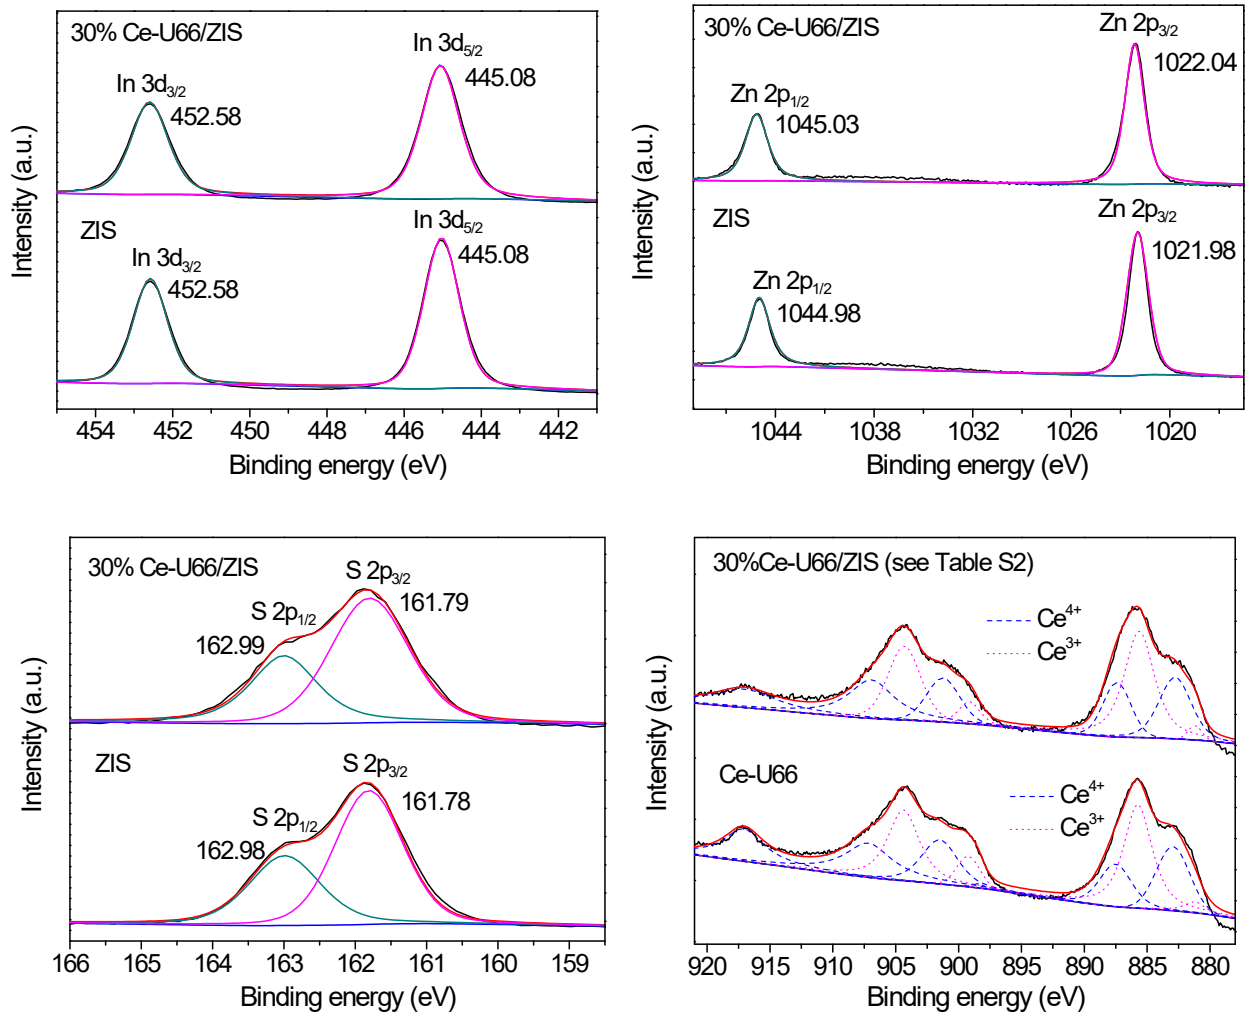

**Fig. S4** XPS spectra of In 3d, Zn 2p, S 2p, and Ce 3d, for the samples as indicated by the legends

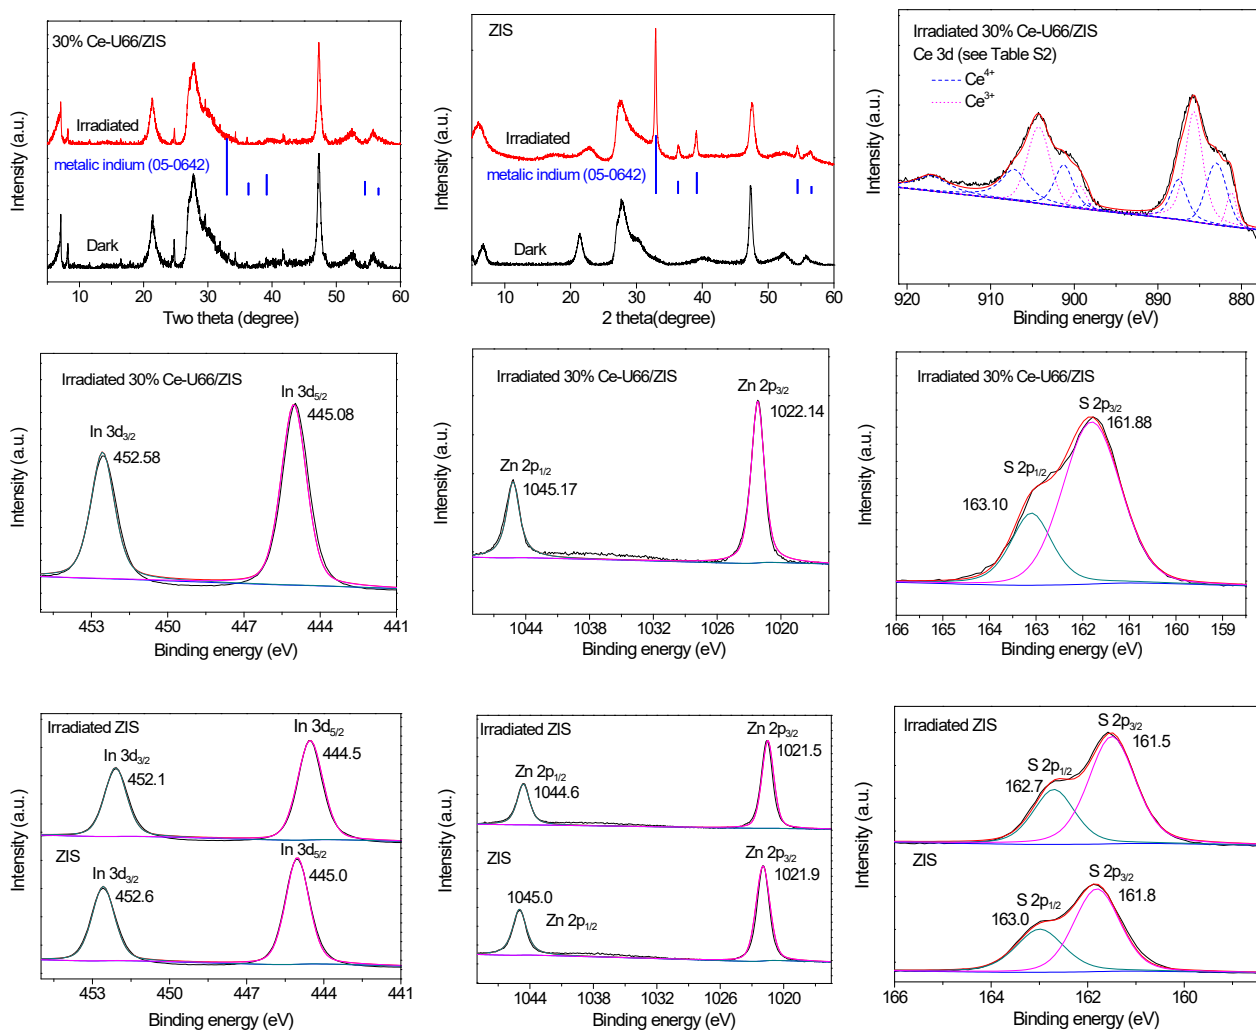

**Fig. S5** XRD patterns and XPS spectra for the dark and 8 h-irradiated samples

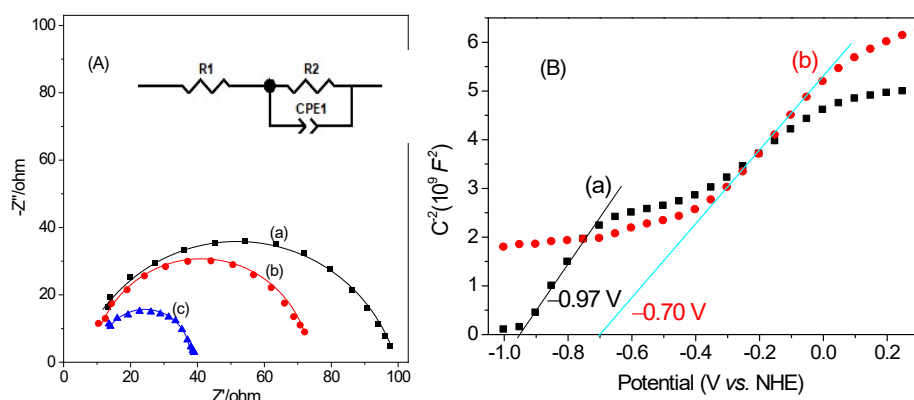

**Fig. S6** (A) Nyquist plots for a film electrode of (a) ZIS, (b) Ce-U66, and (c) 30% Ce-U66/ZIS, measured in the dark at a potential of 0.2 V (NHE) in 0.5 M NaClO<sub>4</sub> under N<sub>2</sub>. (B) The corresponding Mott–Schottky plots, measured in the dark at 1–1 × 10<sup>6</sup> Hz.



## References.

- 1 C. Gomes Silva, I. Luz, F. X. Llabrés i Xamena, A. Corma and H. García, *Chem. Eur. J.*, 2010, **16**, 11133–11138.
- 2 S. Mao, J Shi, G. Sun, D. Ma, C. He, Z. Pu and K. Song, *Appl. Catal. B: Environ.*, 2021, **282**, 119550.
- 3 X. Peng, L. Ye, Y. Ding, L Yi, C. Zhang and Z. Wen, *Appl. Catal. B: Environ.*, 2020, **260**, 118152.
- 4 H. Liu, J. Zhang and D. Ao, *Appl. Catal. B: Environ.*, 2018, **221**, 433–442.
- 5 W. Hou, C. Chen, Y. Wang and Y. Xu, *Catal. Sci. Technol.* 2022, **12**, 4012.
- 6 S. Mao, Y. Zou, G Sun, L. Zeng, Z. Wang, D. Ma, Y. Guo, Y. Cheng, C. Wang and J. Shi, *J. Colloid Interface Sci.*, 2021, **581**, 1–10.
- 7 C. Li, X. Liu, P. Huo, Y. Yan, G. Liao, G. Ding and C. Liu, *Small*, 2021, **17**, 2102539
- 8 S. Zhang, M. Du, Z. Xing, Z. Li, K. Pan and W. Zhou, *Appl. Catal. B*, 2020, **262**, 118202.
- 9 S. Mao, J. W. Shi, G. Sun, Y. Zhang, D. Ma, K. Song, Y. Lv, J. Zhou, H. Wang and Y. Cheng, *ACS Appl. Mater. Interfaces*, 2022, **14**, 48770–48779.
